# Supplementary material for: Identification of Ten Core Hub Genes as Potential Biomarkers and Treatment Target for Hepatoblastoma
Source: Front Oncol. 2021 Apr 1;11:591507. doi: 10.3389/fonc.2021.591507 (PMC8047669; doi:10.3389/fonc.2021.591507)
Supplement: Supplementary file 14 [file Table_5.xlsx]

## Sheet: Sheet1
symbol
HSD17B6
SLC22A1
PLGLB2
CYP4F2
HABP2
PON1
HPX
FAM110C
F9
NRAP
TTR
RGS9
KIF19
FCGR2B
GCKR
AZGP1
SLC43A3
SDC4
GCH1
C4BPB
RNF152
MGLL
IRF8
APOC4
RASGEF1B
ECHS1
SERPING1
SHB
ASMTL
ARL6IP4
GMEB2
STXBP2
PSMC5
MRPL51
CSNK1G2
DTX2
L3MBTL2
SAP18
ELAC2
WDR74
B4GALT2
BRD4
STX8
TAF6L
ILVBL
SON
HIGD2A
TMEM222
TUBGCP2
MOGS
SNF8
PSMC4
ZNF780A
POLR2H
GFER
MRPL21
DUS1L
EIF5B
ATG16L1
LAS1L
COMTD1
LRP3
CHMP2A
DHPS
AAMP
MRPS15
UBXN1
GMPPA
DNAJC11
FLOT1
NAA10
SHFM1
COPE
DAZAP1
UPF2
CLK3
PPP1R7
AUP1
CDC37
MRPL27
PDZD11
ARFGAP2
BCAP31
DNM2
PRDX5
MRRF
PQBP1
SLC25A39
COMMD1
LONP1
C9orf156
H2AFJ
YY1AP1
GEMIN7
ROGDI
NADSYN1
PHB
GEMIN8
STK11
POLR2I
NMT1
ZNF263
RNF215
SRRT
PIH1D1
CCDC12
MON1A
MRPL22
TMEM214
SAFB2
HSPBP1
WDR46
FLAD1
SLC25A38
FAM193B
VPS52
ATP5J2
EXOC3
CCDC159
JMJD8
MRPL28
NHP2L1
PGP
PFKL
PPIA
TRMT2A
UBXN6
ERCC5
ANKRD54
SRRD
EWSR1
PPIB
PNKD
FNTA
DGCR14
SNRPD3
SERTAD3
AP2M1
IDH3G
CAPN1
SPAG7
DDX49
TCIRG1
ZDHHC16
MBOAT7
RAF1
LMF2
SLU7
TMEM115
MED16
GBA2
MED26
TXNL4A
ANAPC11
SIRT6
MRPS7
MAP3K12
CYHR1
ORMDL2
AGAP3
ABCA2
UBL5
OGFOD2
NDUFAF3
AP1S1
TIMM13
SERF2
ALDH16A1
OPA3
FAM89B
VARS
ZNF524
NEDD8
CSTB
NSMCE1
PDAP1
CHMP4A
PFDN6
EMG1
PCSK7
MIIP
UXT
RBX1
CTDP1
MRPL17
TRAPPC5
SIRT7
ALG3
RHOT2
TIMM50
TESK1
NCLN
HMG20B
LEMD2
C14orf166
IMP4
GPATCH3
R3HCC1
SSNA1
RAB24
CSNK2B
CCDC101
TRIM41
PURB
DEDD
PLXNB1
DENND1C
PIGM
ZNF428
MTHFR
CTBP1
PRR14
SEC22A
ZC3HC1
CHMP1A
MAP2K7
PRKCSH
HCST
MED11
POLRMT
RPS6KB2
PYCRL
ARHGAP17
ATP5SL
GNL1
GPR108
CAMTA2
GABARAP
UBE2M
PIN1
NARFL
SH3GL1
ZNF276
SEC13
ATG4B
ULK3
UBA52
CAMK1
MAP3K11
RTF1
SSBP1
CWC15
MTCH1
XPO6
PPP5C
TMEM161A
ENGASE
BRF1
MTMR14
NEDD4L
SLC35C2
REC8
GOLGA3
MAF1
SHARPIN
EPN1
RPAIN
MRPL43
MRPL52
CCDC84
C19orf52
IRF3
MRPL53
POP5
JUP
MECP2
MAEA
C21orf2
FAM134C
DUSP22
RNF187
PRPF31
DIS3L2
CCNL2
EXOSC5
RFNG
AKT1S1
NOSIP
CAPNS1
PDCD5
CLTA
HMHA1
EXOSC1
HEXDC
PI4KB
LRCH4
ADRBK1
FAU
CARS2
PSMB5
AP3D1
CTTN
FAM193A
NRF1
BANF1
APTX
EIF3B
THAP4
COPS7A
CWF19L2
COG1
PSEN1
ALKBH6
PRCC
MEA1
ARPC3
TADA3
BET1L
NDUFAF2
CDK18
HS1BP3
TNRC6A
C14orf119
DGCR8
RHBDD3
DDA1
ADAT3
ZNF335
PISD
APBA3
TELO2
IK
GPS2
PPM1G
GDI1
DCP1A
SNX8
ZNF839
SAP30BP
FKRP
WBSCR16
PRPF6
ZFHX3
CHPF2
EXOSC7
ZNF805
NAGK
N4BP1
PLOD3
MRPS33
ZBTB17
B4GALT7
MCRS1
TRMU
ACTR1B
SHANK3
ELP3
CUEDC2
WDR34
LZTR1
CCDC73
HNF1A
RNF181
RNF25
TOMM5
NOC4L
TCEB2
FTSJ3
DNAJC7
RPS6KA4
SMG5
TUSC2
KLHDC3
BOLA3
RBM42
CLEC16A
HDLBP
PTPN23
CD2BP2
SGSM3
QTRT1
CUL9
TBC1D10B
CPSF3L
TRMT1
UBA1
PMF1
PPP1R12C
RASSF4
TBL3
IRF2BP1
HIRIP3
MRFAP1L1
WDR24
FUZ
ILK
FYCO1
DHX30
COASY
U2AF2
DDX41
GRK6
ZMIZ2
PACSIN2
HGS
TBL1X
CHERP
PLOD1
ERI3
SNRPC
CHKA
SART1
CTDSP1
GPS1
POMT1
RNASEH2C
RNF7
ATP13A1
ZMYND19
TJAP1
MAN1B1
ZSCAN2
CENPB
AMPD2
PEX10
BCS1L
TBCD
NHP2
TBC1D7
TRIT1
MEN1
TRAPPC6A
INO80E
NFU1
GLTSCR1
PILRB
USE1
JOSD2
TM7SF2
ZNF768
UBE2Q1
RBM5
ACOT7
ZC3HAV1
PHF1
WDR83
KDM5C
SUPT7L
MIF4GD
REXO1
ARFRP1
ZNF317
DYRK4
CARD8
COPS6
C17orf62
MYL5
ADCK5
CHFR
MKNK1
ALG12
THOC2
GIPC1
C12orf10
FAM160B2
SH3GLB2
ROMO1
BAP1
CIRBP
ZBTB8OS
SDF2
SAMM50
AATF
PTPN18
ELOVL1
TAF9B
EHD1
EFHD2
NFYC
MBD3
RAB11FIP5
FASTK
DRAP1
UNC93B1
GGA1
FAM86A
ZFAND2B
TEAD3
SNAP47
CNOT10
TSPAN4
SF3B2
CRTC1
DNAJB2
CTU1
ZFPL1
EIF3G
RNASEK
MPI
NUTF2
CORO1B
ST5
C19orf53
SHC1
PABPN1
CRYGS
TRAPPC2L
CCDC124
FAM83H
ARPC1A
C1orf159
PTPMT1
LUC7L
LPIN3
URM1
POLR2D
CNOT3
MORC2
ITFG3
RPUSD1
UBXN11
FBXL12
DRG2
YIPF2
ZER1
NR2F6
CCDC149
DCTN5
C6orf1
DHRS7
SETD1A
MTX1
TMEM216
KPTN
CCDC130
GGA3
NACC1
RPP30
DRG1
PTOV1
USP20
SPTAN1
PRKD2
C19orf47
C1orf123
CC2D1A
ANKRD17
CNOT4
CDK5RAP3
ACIN1
MAP2K2
TAF1C
POFUT2
ZNF32
SGSH
EIF3D
CCDC61
TMEM177
ENTPD6
MPHOSPH8
ALDH3B1
NEU1
PDDC1
LSM4
SUPT4H1
CTNNBIP1
STAM2
RANBP3
TRAK2
RBMX2
FBXW4
RPL22
CDC123
NF2
ABHD14A
DFFA
RPS6KA1
HAUS7
GTF3C5
SLC25A29
TMUB2
CXXC1
PTGES2
VAMP2
KRI1
TAF15
RAB11FIP3
CLCN7
NCAPH2
SPPL2B
ANKRD16
SETD4
SPON2
RNASET2
SCRN2
NFKBIL1
GAS8
CENPT
MRPL9
EIF2B4
CYP2R1
RIC8A
IQSEC1
TBC1D22A
RALA
TBC1D17
HAUS8
PPP1R16A
CBY1
SF3B4
CD99
ZNF490
RPL21
OXA1L
RPS13
MED24
ARHGEF1
TRIM3
CCDC92
SPDYE7P
CRTC2
PAK4
MICALL2
MED19
B3GALT6
VPS28
INPP5E
NUP214
HMGXB3
RFT1
TARBP2
GLTP
NME3
SPATA20
THOC6
LLGL2
SEPW1
WDR81
LCMT1
RBM10
DCTN2
ZNF668
KCTD2
PCGF3
ATP6AP1
PLEKHM2
TIMM17B
TIMM9
RUFY1
COMMD9
FAM134A
TMEM11
OTUB1
ZNF526
SSR4
CDC42EP2
XAB2
PUSL1
MAPK8IP3
EXOSC8
MYO9B
CYP20A1
SYMPK
TCEAL4
D2HGDH
CDK16
PPP1R12A
CDK5
COG7
RECQL5
HDAC10
C19orf25
CMTM7
FLII
MED27
ERCC2
SLC12A9
PIGH
ELMOD3
YDJC
OSGEP
POLE4
KIAA1919
COMMD4
ATG9A
INPP5A
POLH
DYNLRB1
DENND4B
NBPF3
MMP24
ZNF2
KRTCAP2
FKBP8
LPPR2
GPN1
PCNXL3
ITPA
PFDN5
IFFO1
RPL24
CDK10
HYAL2
AMIGO3
PEX6
SSR2
MAST3
LRP5L
ZFYVE1
MGEA5
POLM
DMAP1
ZNF69
HDDC3
CALML4
MAN2B1
HHLA3
PGS1
RNF31
TMEM150A
ANAPC5
TSC2
PPP2R1A
GPR137
JMJD4
DGKQ
CLN3
THEM4
ZNF384
UBQLN4
SBF1
NME4
ANKRD39
PFDN1
MRPS23
CWF19L1
AIP
CRYBB2P1
LUC7L3
MOV10
COIL
MTA1
CLN6
PRKRIP1
NOL12
RCE1
LENG1
ARHGAP27
RPL10
RAMP1
FLJ42627
UPF3A
TSEN54
PSMD4
KAT2A
RAB13
VPS39
NOL9
CCDC127
RP9
TRMT112
COG4
CAMK2G
C12orf57
ADSL
ZBTB22
VPS72
CHRNE
EPN2
FAM50A
HN1
PTPRU
SEMA4D
ALKBH4
PLXNA2
ZBTB48
RNF220
TAF3
UBAP2
MYO7A
ZNF324B
CAPS
TMEM55B
TUBGCP6
ING5
TFPT
MAP3K10
EEF1D
TMEM18
POGZ
RPS9
SARS2
ZNF76
MANBAL
SIX5
SPNS1
FAM20B
ZNF652
CCAR1
RABGGTA
POLR3F
UBOX5
MXD3
AARS2
FIBP
ZNF628
SMAGP
RPS29
ZNF441
VARS2
LSM7
BUD13
INTS3
ICAM2
HIST1H2BK
DDX42
ZNF358
STRN4
SMPD2
AGRN
RPL3
TCTN3
ZNF574
HDAC1
DUSP28
EEF2
PTPRCAP
PNPLA6
HCFC1R1
RPUSD3
DTNB
PML
FOXP4
TTC23
ACACA
RPS25
DEAF1
USP39
DEF6
MRM1
WRAP53
APH1B
NDOR1
IRAK1
LAMB2
FOXN3
WIZ
MIB2
OFD1
RAB15
AKAP8L
MTMR4
SMYD5
C2orf68
INO80B
TMEM180
ATP6V1F
ARAP1
ALG9
FUS
BCL2L2
CPNE2
STRADA
SMARCE1
UBL7
BAX
CCNB1IP1
E4F1
TUBG1
PTPRS
CCT7
RPS28
NACA
PPAP2A
NME1
VPS45
NISCH
LSM2
SMYD4
PYCR2
THG1L
EDC3
ERCC3
EIF4EBP1
GTF3C2
MAP4
TRAPPC1
MYEOV2
TRAFD1
NAT6
GAPDH
NBEAL2
RPL34
NT5C
DMWD
DCTN1
MANEAL
FCHSD1
POU2F1
EXOSC10
RPP21
AGPAT1
DCP1B
DVL1
RPS16
AAAS
PCIF1
FIZ1
GHDC
VPS33B
EP400
RTEL1
ERAP2
ACBD6
GRB7
ATXN7L2
MBD6
ZNF862
OBFC1
GIT1
SHKBP1
CCT3
MAZ
SCMH1
SNRPD2
NPEPL1
CARM1
RXRB
NEK8
ZRSR2
ZNF20
SNRNP200
CHD8
ST3GAL3
MXD4
RHBDF2
EMP2
DEF8
UNK
ZNF444
RPL39
WBP1
RNPEPL1
RABEP2
PNKP
PAAF1
RPL30
THUMPD2
NUDT2
RALY
RNF26
RPL35A
ZNF205
POLR1D
DOK4
PKD1P1
POLL
XKR8
WDR6
RAVER1
C17orf49
CLCN5
POLR2J3
SECTM1
SSBP4
FBRS
CLIC1
MZF1
MAP4K2
NR2C2AP
FBL
TRNAU1AP
CNIH4
WDR75
LGALS3BP
CPSF4
NOTCH4
PACSIN3
UNC45A
CLCN2
STK25
ZNF687
TRIM28
ZNF821
ZSCAN18
MLST8
NAIP
PLCD4
SRM
CYTH2
CNTROB
EIF3F
VPS11
ZFYVE26
HDDC2
CXorf23
SEMA6C
BZRAP1
RPL37
SLC27A1
PKD1
FDFT1
DGUOK
ATP5G2
NARF
RPL27A
CLDN15
MAPK7
ZBTB45
UBXN2A
PGLS
KIF12
NCOR2
ZSWIM4
ANKS3
CLK2
PPM1M
FAM195B
DLG4
GDPD1
GADD45GIP1
HRAS
DOCK6
NHEJ1
CCDC24
TOM1L2
C8orf58
RPS10
TGM1
ZNF784
ASTE1
MEF2B
DALRD3
TAOK2
STRA13
DGKZ
RPS20
PLCXD1
TUG1
CCDC142
DCAF15
PYCARD
AP1S3
RPL6
NUMA1
ZNF414
NME6
BTBD2
PCOLCE
RAB11FIP1
RPS15A
LIMD2
EVI5L
RGS12
RPL28
ZNF256
RRAS
TCOF1
C1orf35
RFXANK
PBXIP1
FAM120C
RPL26
RPL11
ZNF544
TMEM79
SIN3B
PDE6D
SUV39H1
ZNF589
RPL27
GTF2IRD1
PRKAR1B
UFC1
KRT10
NPFF
LOXL3
ZNF211
SH2B1
SNRPA
ABL1
ATXN7L3
RPS27A
ZNF480
RPL35
GIGYF1
RPS27
RPL9
MIF
RPS6
COG2
KIAA0895L
IP6K2
MYO15B
RPL32
FKBP11
ARHGEF16
ACAP3
RPS12
FLYWCH1
MPV17
RPL10A
GTF2F1
SLC25A23
H1FX
PCDHGC3
SLC44A2
KCTD10
EEF1G
PRKCZ
MAP1S
ARMCX6
PHPT1
RBPJ
RPLP1
BRD9
EEF1B2
C16orf13
THAP8
ZNF646
LYRM4
NVL
FGFR4
FBXO31
CPSF3
LMAN2L
C11orf68
WDR27
PLTP
RPS14
PPIH
ANO10
FBXW9
RPS3A
ITGB1BP1
RUVBL2
BLVRA
WDR90
MERTK
NPR2
NFRKB
RPL23A
MSTO1
C1orf86
SH3BP5L
CRAMP1L
DFFB
ZNF213
COX19
ATIC
RPTOR
SLC25A6
RPL21P28
SPAG16
RPL38
TNRC6C
C14orf80
SCRIB
TMEM91
EXOC7
ZNF749
SCAF1
RBM34
RPLP2
DCLRE1C
PRUNE
ISCA2
RPL13A
ZNF586
FGFR3
CIR1
TMEM198
ZNF621
SLC26A11
PTDSS2
TNK2
CD320
MICAL1
PRMT7
RBMS1
PI4KAP2
IDI2
QARS
PELP1
SCAMP1
ZNF587
SKA2
UBAP2L
ACLY
GEMIN6
ZNF629
RPL5
SPIRE2
INTS9
ZNF341
VWCE
KIAA1522
PHIP
RPL14
C22orf46
SGSM2
ZNF133
AP4M1
RPS11
HDAC5
PACS2
PELI3
RPL19
EMILIN3
ACTR5
ZNF692
TMEM42
ADM2
BCL7C
HIST1H1C
SNAPC2
PLEKHO1
VIL1
DIP2A
MUTYH
ZNF79
RILPL1
PPM1F
ZNF282
MFSD5
TBCB
RPL4
RPS23
EP400NL
IP6K1
NUBPL
CYBA
RPS24
SNTA1
ZMYND8
SCD
CAMKK1
INPP5F
LYG1
TSC1
CYP27B1
SMARCAL1
SLC2A4
DENND2A
EFNB1
RPLP0
TMSB10
COPS7B
KHNYN
SDCCAG8
SMTN
ELF4
APOBEC3G
ZNF600
RP9P
PCBP4
STK11IP
PLSCR3
YPEL3
WDYHV1
KCTD17
BSG
ZNF337
S100A13
TACC1
THRA
PIP5K1C
RPL12
ANKRD13D
RPS21
TBC1D16
HAUS5
GLTSCR2
SLC38A6
LOC692247
MED22
ZNF155
MRPS21
PLCD1
TAF6
DDAH2
CIZ1
SMARCA4
PLCB3
ZNF580
MCF2L
CAD
KIAA0195
ZNF563
IMPDH2
TCF7
NAPSA
MLLT6
ANKRD23
ZNF707
ST6GALNAC2
SEPN1
RPL17
IGBP1
C2orf44
FLYWCH2
ZNF837
PKP4
TMEM51
TAX1BP3
GNB2L1
ABCC10
ADA
IDUA
CRIP2
FAM127A
ZNF416
RAD18
FBXO24
ZNF175
CDKN2AIPNL
SNRPN
TTC21A
RPL13
XYLT2
CCDC97
NPDC1
RGL2
C6orf226
RPL36
AGPAT4
SEMA4G
PLXND1
CLUAP1
HERC2P2
ABR
DHX57
ASPRV1
RPS8
ZNF419
ACRC
LSS
RPL18
ZNF773
PIK3R3
CREB3L4
ZSWIM1
RPS15
FLJ30403
MKS1
IFT172
SAP130
NOVA2
RPS18
TOR3A
SF3A2
PPOX
RANGRF
RPL8
SOX18
POLG2
TIGD5
IFT140
FAM53B
SLC7A6OS
CYGB
PYGB
SMO
SLC22A23
FHL3
MIER2
ABCA7
C20orf27
TLCD1
G6PC3
THOC5
RGS19
HDAC7
RPL29
MED25
ARSE
FBXL19
C9orf16
KLC2
HERC2P4
MRPL10
RPS4X
MAPK13
B3GALNT2
RPL23
CTRL
HPS4
FRS3
METTL8
BCL9L
C17orf53
SLC39A13
YY2
TTLL3
PLA2G6
PRR12
NDRG1
NUMBL
PRAF2
RPS5
TGFB1
CASKIN1
CUL7
VPS33A
GRAMD1A
THBS3
RPS19
UBE2S
BAHCC1
RBMS2
SETDB1
DNMT3A
RPL22L1
ZNF362
NPM3
ZNF142
PKN1
STK36
FAM45B
ATN1
PIP4K2B
ATP1B3
MAGED2
PCYOX1L
RAMP2
SH2D3C
RPL18A
SLC22A15
LOC728554
FAM69B
FGFBP3
DTYMK
RPS7
S100A11
ZNF565
DGKD
ARHGEF2
HOMER3
CCDC122
FHOD1
USP21
NBR2
SH3BP1
PKN3
HSD11B1L
SETMAR
LOC401052
GSN
RUSC1
GDPD3
TRIP10
FBXL18
DDR1
MFSD10
USHBP1
DUSP7
DPCD
C8orf44
TRNP1
TRIM52
RECQL4
RPS3
TRIM65
NEK3
IL3RA
DYRK1B
C19orf48
C6orf48
TMC6
ZNF117
C19orf44
TMEM101
AP1G2
ZNF16
RBP1
FAM178A
JARID2
ZNF418
SH2B2
CHIC1
RPL31
TMEM97
ALMS1
WFS1
TMEM81
FKBPL
SLC22A17
ARL2
LPCAT1
CEMP1
TSPAN15
CHTF18
NAGPA
LRRC23
PRX
SLC7A6
ZNF512
GLI4
FAM71F2
PHF19
POPDC2
HIST2H2AC
MTA3
ANKZF1
LOC100128398
REEP4
NCS1
GATA2
YJEFN3
CMTM4
GAL3ST1
LRRC48
NCK2
SLC1A4
LRFN4
RPL37A
RPSA
SEMA3F
ZNF775
KRBA1
CCDC28B
LRRC45
CCDC104
PARVB
WFIKKN1
NCKIPSD
PAQR4
DVL2
LOC81691
RPS2
TUBG2
DSG2
CCDC40
C14orf132
PLXNA1
TK1
LOC728613
TBX3
LY6G5C
C17orf59
ZMYM3
WDR52
VDR
NRM
FAM127B
ASAP3
CROCC
MYL6B
FCGBP
ZNF496
KCTD1
NRSN2
TEAD2
ADRBK2
ZNF219
C11orf84
B4GALNT1
GPR56
ZNF581
PPP2R3B
PKMYT1
SOX17
OBSL1
ZNF671
GPSM1
CCDC154
HSPA2
BCL6B
AVIL
DMPK
RNASEH2A
CAB39L
NUDT1
HEATR6
RAPGEF3
GIN1
GYS1
SLC4A5
ZNF829
SLC25A35
FAM109B
ACR
SAC3D1
ZNF233
PCGF2
ADAMTS10
ABLIM2
TBKBP1
DSTYK
THAP3
CAPN10
LZTS2
PIAS3
CCDC88C
MMEL1
LMO2
RCN3
MSH5
SYNGAP1
NLGN2
TNFRSF25
ITPR3
ACE
TMED3
CHST6
EHMT2
MEIS1
SLC29A2
PLEKHH1
RARG
P4HA2
SOBP
KCTD15
ZNF788
SOX12
C3orf18
FBXO41
JRK
LRRC24
DOK1
ZNF549
CRMP1
IGSF21
ZFP62
MTR
ZNF579
IGF2BP2
LIMK1
SPAG4
LOC100129534
C17orf97
TBX2
B9D1
FBLL1
RHOBTB2
SLC26A2
ETV2
ROBO3
PTPDC1
RBP7
CHST5
BAMBI
NMB
CC2D2A
RAPGEFL1
SLC9A3
ZNF708
S100A6
TPPP3
BTNL9
MAP9
RHEBL1
PRRT1
APBB1
ISYNA1
BMF
OBSCN
CLIP2
HEY1
TRIM45
LPCAT4
KIF7
PODXL
KDELR3
PBX4
ASB2
STK32C
RGS10
LOC100129484
PGBD1
DTX3
ZNF284
IMPDH1
LDLRAD2
LOC654342
TP53I3
CACNA2D4
KGFLP2
CLDN5
PRKX
DLG3
OSBPL7
BIRC5
TMEM98
SLCO2A1
PHLDA3
JAG2
CLIP3
NAT14
NLGN3
ZNF320
ZNF385A
RAB34
SLC16A11
C2orf81
TRIB2
SLC26A6
ZNF530
ASAP2
SRCRB4D
TARBP1
MAP1B
HDAC11
TMPRSS9
RNASE1
PRR15L
STMN3
FSCN1
MLF1
PROCA1
PAX8
HAGHL
CCDC96
CHST10
GYLTL1B
EFNA4
ITPKA
POLN
SLC6A8
RASA4
ANKRD13B
SLC29A4
SELM
RAB3D
SMYD3
DMKN
KRT19
NDN
CENPL
FAM3B
RHBDL1
RPL13AP20
HOXA4
PLEKHG4B
PSTPIP1
PYCR1
TBX6
MYO7B
AIM1L
P2RY6
PPP1R3D
FAM189B
ZNF570
OTUB2
IGFBP6
RHPN1
GSTP1
RNF43
TTLL1
TRAIP
TIGD1
CCDC8
FKBP1B
IL17RD
ASNS
LAMA3
BIK
CDC42EP5
HAPLN3
B3GNTL1
FOXQ1
ZNF703
LEPREL2
NDRG4
GPR173
MAPK12
TYRO3
LOC100294362
CBLN1
FAM43B
GDF11
HAS3
IGSF3
TFAP2E
PTPN14
NT5M
GRIN2D
WDR54
CACNB3
DZIP1L
NKD2
GLUL
WTIP
PAFAH1B3
GPR161
TMPRSS5
UST
NT5DC2
LOC728715
AMH
TMEM132A
PTP4A3
TMEM136
LOC645166
LDOC1
FAM86B1
FXYD2
PGAM2
ASPSCR1
TRPC1
C9orf9
SLC7A10
C16orf59
STOX2
SEMA3B
UPK3A
EFNA3
MYO1A
ZNF296
FABP4
CPXM1
FBLN1
SEMA4F
USP51
HS3ST3A1
SPIB
SH3RF3
BRSK1
PPAP2C
RHBG
FZD2
GNG4
ITGB4
COX4I2
AIF1L
GJC2
PEG10
FLJ22184
CDH24
NDUFA4L2
APOBEC3H
EID2B
LSAMP
MXRA8
TUBB3
DSCAML1
BAIAP2L2
PLVAP
TPSAB1
CTXN1
DYDC2
SLC4A3
CKB
FOLR1
MUSTN1
IGDCC3
F2RL3
CPNE7
SLC22A11
GNB3
TFF3
PDLIM4
SP5
MDFI
CDH16
NPB
SPINK1
CRABP2
FUT2
EPS8L3
TMEM59L
MEG3
COL11A2
MSX1
SMPDL3B
WNT6
KRT23
TCF15
CEL
TNNC1
FER1L4
FGF18
CRLF1
DLK1
NKD1
EPCAM
NPNT
TNFRSF19
ROBO1
GPC3
BMP4
LGR5
NOTUM
ITGA2
IGF2BP1
MAGED1
SERPINE2
TYMS
CEP68
APCDD1
HSDL1
OXCT1
DKK1
GNA12
H2AFY2
LEF1
GREB1
HIST1H2AC
RACGAP1
PLCG1
FRAS1
CRTAP
ITGA6
NRXN3
UXS1
AXIN2
CD34
PEG3
CD24
SORT1
TSPAN5
ZNRF3
PARD3B
KDELC1
SALL2
DFNA5
HIF1AN
GPX7
LRRC1
FLVCR1
NGFRAP1
SLC7A11
NCAPD2
SQLE
PAPSS1
HSPB1
ARL6IP6
ZSWIM5
LAMC1
SUSD1
ZNF607
SMARCB1
UNC119B
EPHB2
HTR1D
HMGA2
SLC41A3
KIF20A
RHOBTB1
RNF157
USP11
CCNB2
CS
ARMC9
DTL
RPL23AP7
DPEP1
UGT3A2
SRD5A3
MPZL1
SMYD2
HIST1H2BD
ETV1
ZNF543
SLC44A3
HIST1H2AE
TDP1
MMS19
MFGE8
MMP11
SDK1
UBE2T
RBM12
SPATS2
AACS
LRP4
CDKN3
FKBP10
XRCC1
HIST1H3D
CDK6
PRIM1
SUPT3H
CCNA2
MGC57346
MAP7D2
LDB1
ST8SIA3
SNRPB
PHYHIPL
CCND2
NDRG3
CDK4
MCM3
CMIP
WASF1
ZNF174
SRC
DKK4
PTK7
DLG5
PDGFRB
H2AFZ
SUMO2
FAM169A
C1orf74
GINS1
MELK
EDARADD
C11orf49
THY1
USP46
ILF3
NAA40
CKAP2
POLR2G
TOP2A
DYNLL1
PFKM
[truncated: 2,245 more rows]
